# Supplementary material for: A solvent evaporation plus hydrogen reduction method to synthesize IrNi/C catalysts for hydrogen oxidation
Source: Royal Society of Chemistry journal article supplement (doi:10.1039/c4ta00909f), 2014-01-01
Supplement: c4ta00909f1.pdf [file c4ta00909f1.pdf]

## Supplementary Information

### Solvent evaporation plus hydrogen reduction method to synthesize IrNi/C catalysts for hydrogen oxidation

*Weiwei Zhang, Wei Ding, Siguo Chen, Li Li, Hongmin Wang and Zidong Wei \**

The State Key Laboratory of Power Transmission Equipment & System Security and New  
Technology, College of Chemistry and Chemical Engineering, Chongqing University, Chongqing,  
400044, P. R. China.

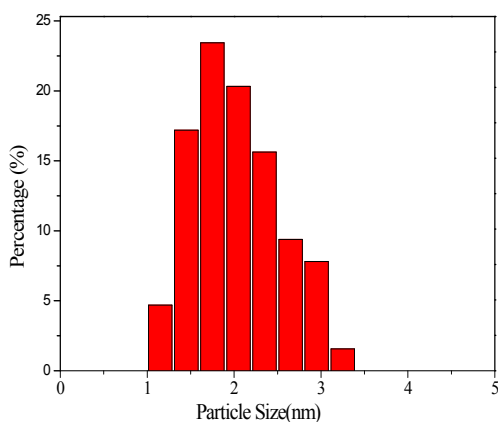

**Fig. S1** Histogram of particle size distributions of the IrNi NPs.

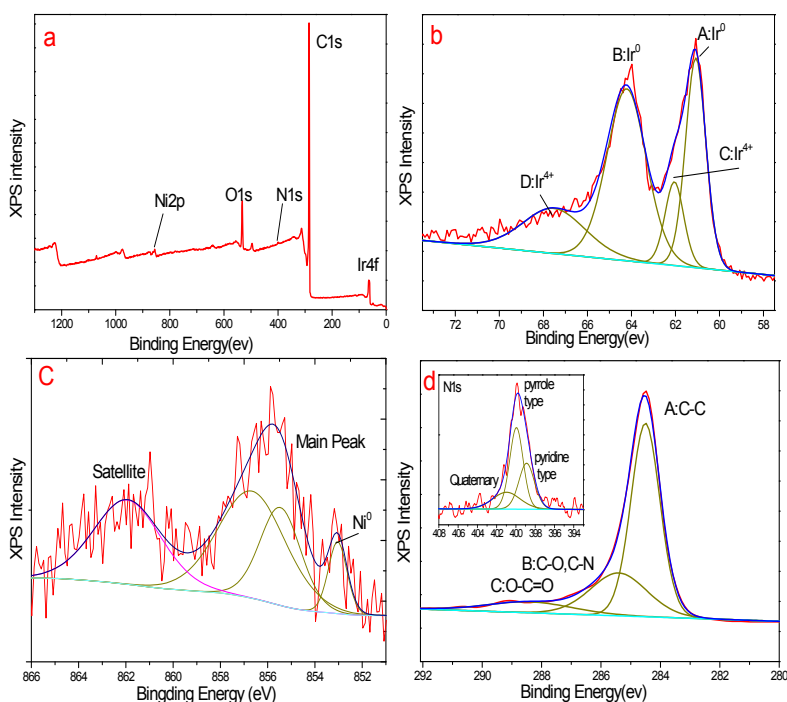

**Fig. S2** XPS patterns for IrNi/C-NH<sub>3</sub>-500. (a) full XPS spectrum. (b) Ir 4f spectrum. (c) Ni 2p spectrum. (d) C 1s spectrum and the inset is N 1s spectrum.

Fig. S2a gives the full XPS spectrum of the IrNi/C-NH<sub>3</sub>-500. The surface atomic ratio of Ir/Ni is 2/1, fairly in line with the mol ratio in the bulk from the EDS data. Fig. S2b and S2c illustrate the XPS spectra for Ir 4f and Ni 2p core-level regions of the catalyst. Deconvolution of the Ir 4f region shows the presence of 2 pairs of doublets. The most intense doublet with binding energies of 61.08 (Ir 4f<sub>7/2</sub>) and 64.22 eV (Ir 4f<sub>5/2</sub>) is attributed to metallic Ir. Another doublet at 62.05 and 67.52 eV could be assigned to the Ir<sup>4+</sup> in IrO<sub>2</sub>. The XPS results suggest that 72% of the Ir is present in a metallic state and 28% is present in IrO<sub>2</sub>. The Ni 2p<sub>3/2</sub> spectra are characterized by a main peak (852-858eV) with a satellite at higher BE(860-865eV).<sup>1,2,3</sup> Deconvolution of the main peak shows the presence of Ni<sup>0</sup> and Ni<sup>x+</sup>. Combining XPS spectra with the XRD results, it's verified that the contraction in

Ir-Ir bond is a consequence of Ni diffusing into the Ir cluster. The existence of oxidized Ni is attributed to surface-oxidation of the external surface Ni after long time ambient exposure. Fig. S2d gives the XPS spectra of C 1s and N 1s. C 1s spectrum shows three peak components at 284.5, 285.4 and 288.39 eV, which are assigned to the carbon component in C-C, C-O/C-N and O=C-O, respectively. As seen in the inset of Fig. S2d, the peaks at 398.9, 400, 401 eV of N can be attributed to pyridinic-like, quaternary and pyrrolic-like N, respectively, indicating the incorporation of N into the carbon support with a surface content of 0.63 at%.

Table S1 The structural parameters from XRD patterns and mass activities of the catalysts.

| Catalyst                                  | Ir(111) peak position(°) | d-spacing of 111(Å) | Lattice parameter $a_{fcc}$ (Å) | Particle size (nm) | Mass activity ( $A \cdot g_{IrNi}^{-1}$ ) |
|-------------------------------------------|--------------------------|---------------------|---------------------------------|--------------------|-------------------------------------------|
| IrNi/C-NH <sub>3</sub> -500               | 41.88                    | 2.155               | 3.7325                          | 2.7                | 453.4                                     |
| IrNi/C-NaOH-500                           | 42.10                    | 2.142               | 3.7099                          | 3.8                | 356.1                                     |
| IrNi/C-500                                | 42.51                    | 2.124               | 3.6788                          | 3.0                | 342.4                                     |
| Ir/C-NH <sub>3</sub> -500                 | 40.66                    | 2.218               | 3.8416                          | 3.7                | 331.9                                     |
| Ir <sub>2</sub> Ni/C-NH <sub>3</sub> -500 | 41.70                    | 2.166               | 3.7515                          | 2.6                | 407.5                                     |
| IrNi <sub>2</sub> /C-NH <sub>3</sub> -500 | 42.69                    | 2.116               | 3.6649                          | 2.2                | 305.1                                     |
| IrNi/C-NH <sub>3</sub> -300               | 41.42                    | 2.178               | 3.7723                          | 1.3                | 366.4                                     |
| IrNi/C-NH <sub>3</sub> -400               | 41.62                    | 2.170               | 3.7584                          | 1.6                | 379.6                                     |
| IrNi/C-NH <sub>3</sub> -600               | 41.72                    | 2.164               | 3.7480                          | 4.8                | 283.1                                     |

### References:

- 1 A. R. Naghash, T. H. Etsell, and S. Xu, *Chem. Mater.*, 2006, **18**, 2480–2488.
- 2 A. Arranz and C. Palacio, *Langmuir*, 2002, **18**, 1695–1701.
- 3 M. V. Landau, M. Herskowitz, T. Hoffman, D. Fuks, E. Liverts, D. Vingurt and N. Froumin, *Ind. Eng. Chem. Res.*, 2009, **48**, 5239–5249.
